# Supplementary material for: Isotopic Differences between Forage Consumed by a Large Herbivore in Open, Closed, and Coastal Habitats: New Evidence from a Boreal Study System
Source: PLoS One. 2015 Nov 11;10(11):e0142781. doi: 10.1371/journal.pone.0142781 (PMC4641657; doi:10.1371/journal.pone.0142781)
Supplement: S2 Data — (XLSX) [file pone.0142781.s002.xlsx]

## Sheet: isoplants_2008_anticosti_corcan
species	sector	habitat_type	specific_habitat	site	d15n	d13c
CORCAN	CE	open	burn	BC1	-3.86	-27.56
CORCAN	CE	open	burn	BC4	-2.29	-26.44
CORCAN	CE	open	burn	BC5	-2.39	-28.69
CORCAN	GE	open	cut	CG1	-2.12	-28.22
CORCAN	GE	open	cut	CG2	-2.25	-28.74
CORCAN	GE	open	cut	CG3	0.57	-27.3
CORCAN	CE	closed	closed_canopy	FC2	-2	-28.28
CORCAN	CE	closed	closed_canopy	FC3	1.18	-32.44
CORCAN	CE	closed	closed_canopy	FC4	-4.3	-30.12
CORCAN	CE	closed	closed_canopy	FC5	-4.25	-28.24
CORCAN	CE	closed	closed_canopy	FC6	-2.12	-28.87
CORCAN	GE	closed	closed_canopy	FG2	-1.02	-31
CORCAN	GE	closed	closed_canopy	FG3	-1.57	-30.53
CORCAN	GE	closed	closed_canopy	FG4	-0.81	-32
CORCAN	GE	closed	closed_canopy	FG5	-7.46	-29.17
CORCAN	GE	closed	closed_canopy	FG6	0.12	-31.53
CORCAN	GE	closed	closed_canopy	FG7	-2.93	-31.73
CORCAN	SE	closed	closed_canopy	FS3	0.32	-29.99
CORCAN	SE	closed	closed_canopy	FS7	-1.47	-30.43
CORCAN	SE	closed	closed_canopy	FS8	-6.21	-29.52
CORCAN	CE	open	canopy_opening	TC1	-3.33	-27.67
CORCAN	CE	open	canopy_opening	TC2	-0.08	-29.25
CORCAN	CE	open	canopy_opening	TC3	-2.74	-28.46
CORCAN	GE	open	canopy_opening	TG1	-1.14	-28.34
CORCAN	GE	open	canopy_opening	TG2	-3.06	-26.53
CORCAN	GE	open	canopy_opening	TG3	-1.86	-26.91
CORCAN	SE	open	fen	TOS1	1.63	-25.56
CORCAN	SE	open	canopy_opening	TS1	-2.74	-28.46
CORCAN	SE	open	canopy_opening	TS3	-1.86	-26.91
